# Supplementary material
Source: PubMed Central journal article supplement (PMC5159334)
Supplement: NIHMS787390-supplement-supplement_1.pdf [file NIHMS787390-supplement-supplement_1.pdf]

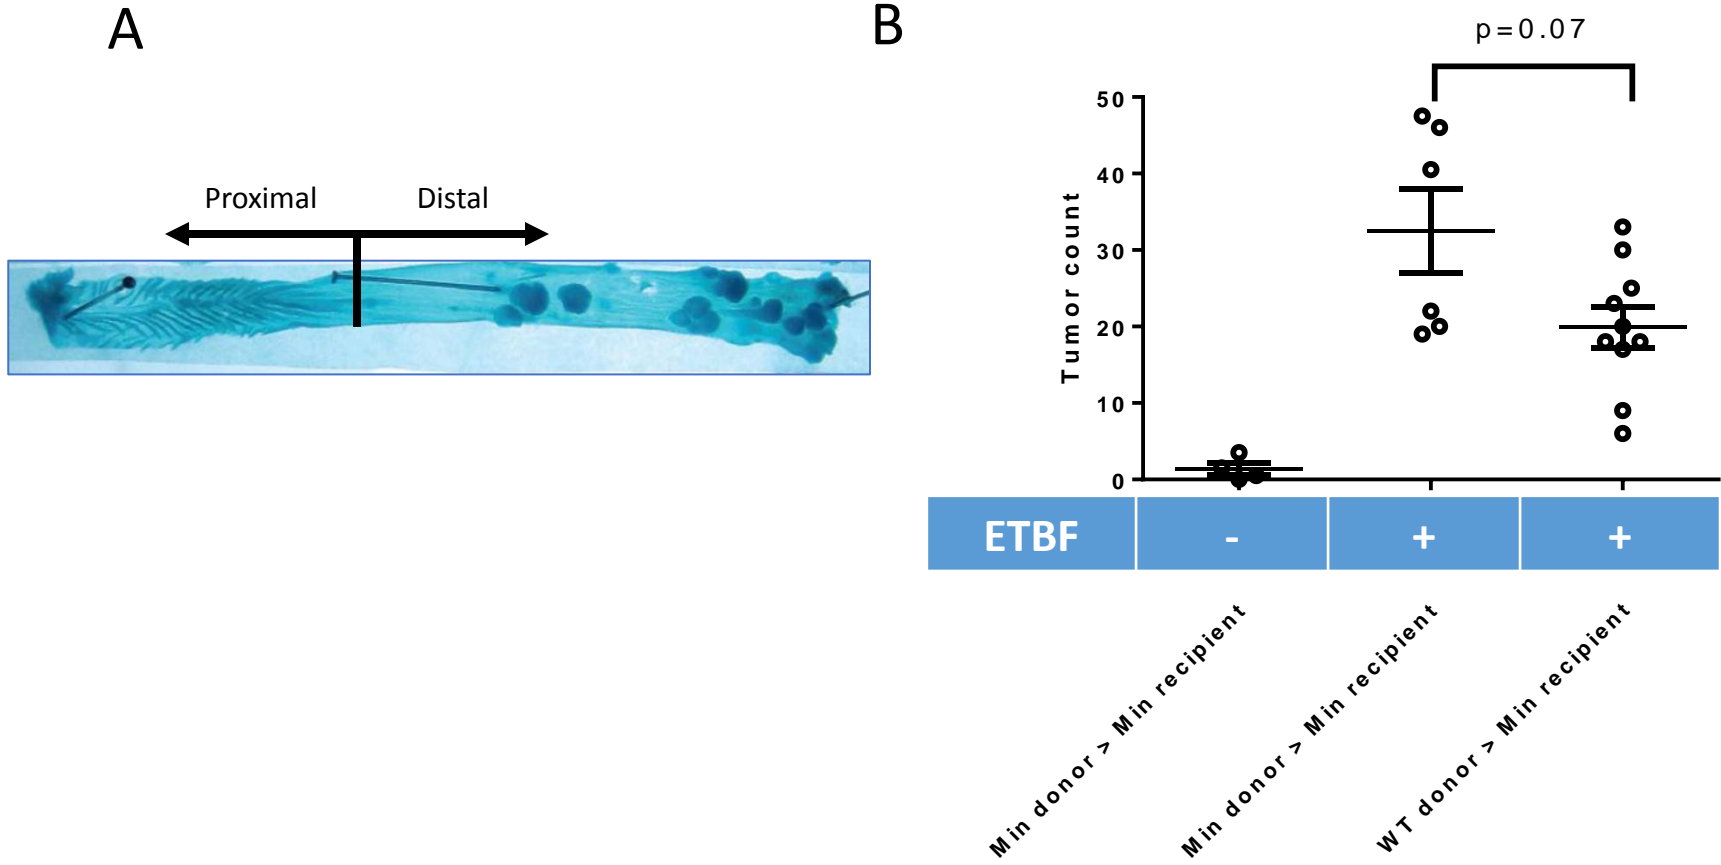

**FIGURE S1. ETBF Min mouse colons.**

**A**, ETBF-triggered tumorigenesis is prominent in distal colons of Min mice.  
**B**, Colon tumor counts from chimeric Min mice reconstituted with bone marrow from wildtype (C57BL/6) or Min donors. Tumor numbers were assessed at 12 weeks after inoculation with ETBF.  
Representative image and graph of n=2 or more independent experiments.

**Figure S1**

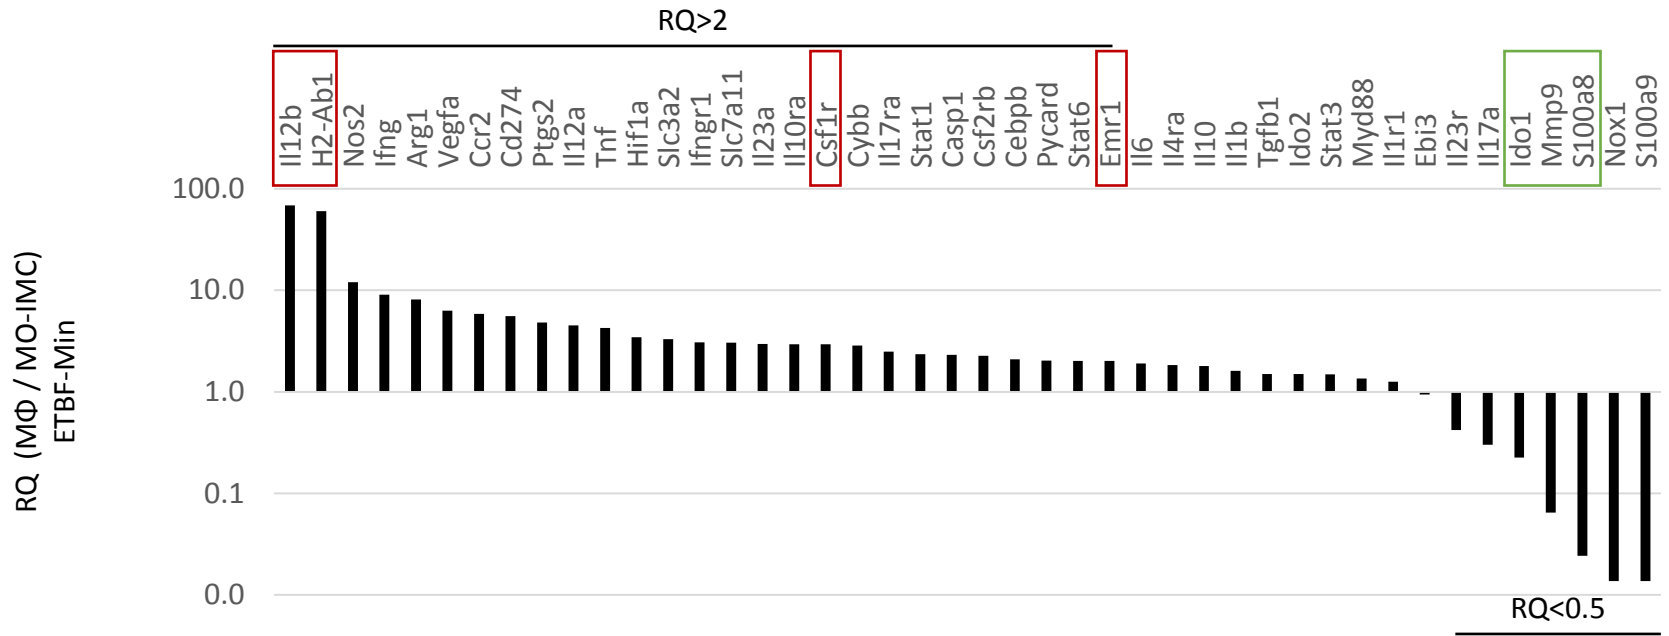

### Figure S2. Gene expression analysis in ETBF tumor-infiltrating myeloid cells.

MΦ and MO-IMCs were cell-sorted from 3 month ETBF Min colon tumors as CD11b<sup>hi</sup>GR1<sup>lo</sup>MHC<sup>+</sup>F4/80<sup>+</sup> and CD11b<sup>hi</sup>GR1<sup>lo</sup>MHC<sup>lo</sup>F4/80<sup>-</sup>, respectively. Bars represent fold increase of gene expression (RQ) in MΦ compared to MO-MDSCs. RQ>1, genes are overexpressed in tumor-associated macrophages; RQ<1, genes are overexpressed in MO-IMCs. Genes characterized by RQ>2 and RQ<0.5 are highlighted above and below the graph. Red boxes indicate genes characteristic of differentiated MΦ; green boxes indicate genes characteristic of MO-MDSCs. Representative graph of n=2 independent experiments.

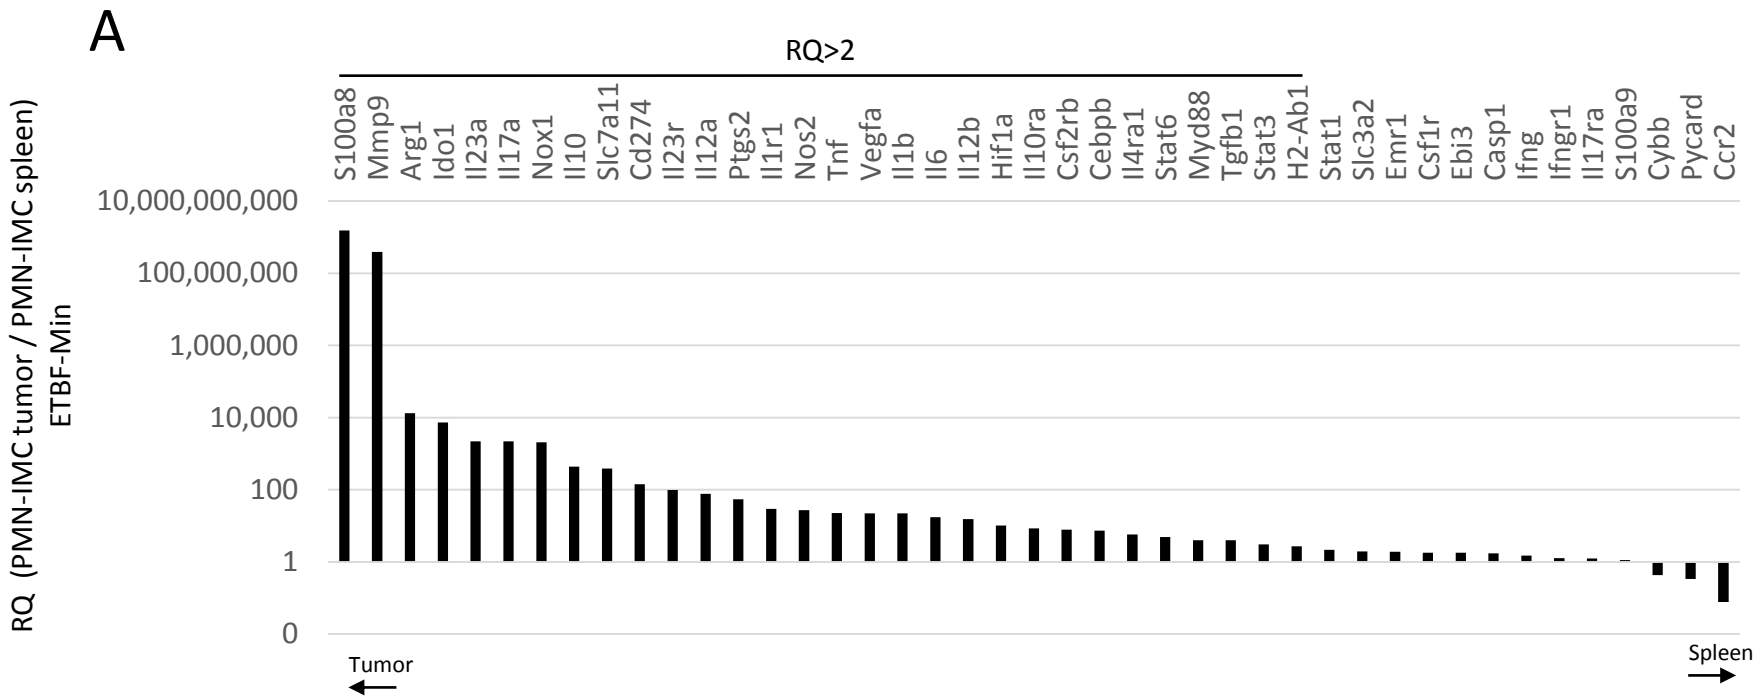

**Figure S3A. Gene expression array in PMN-IMCs sorted from colon tumors or spleen of 3 month ETBF Min mice.**

Bars represent fold increase of gene expression (RQ) in IMCs sorted from tumors compared to those sorted from spleen. RQ>1 when genes are overexpressed in tumor IMCs; RQ<1 when genes are overexpressed in spleen. Genes characterized by RQ>2 are highlighted. Representative graph of n=2 independent experiments.

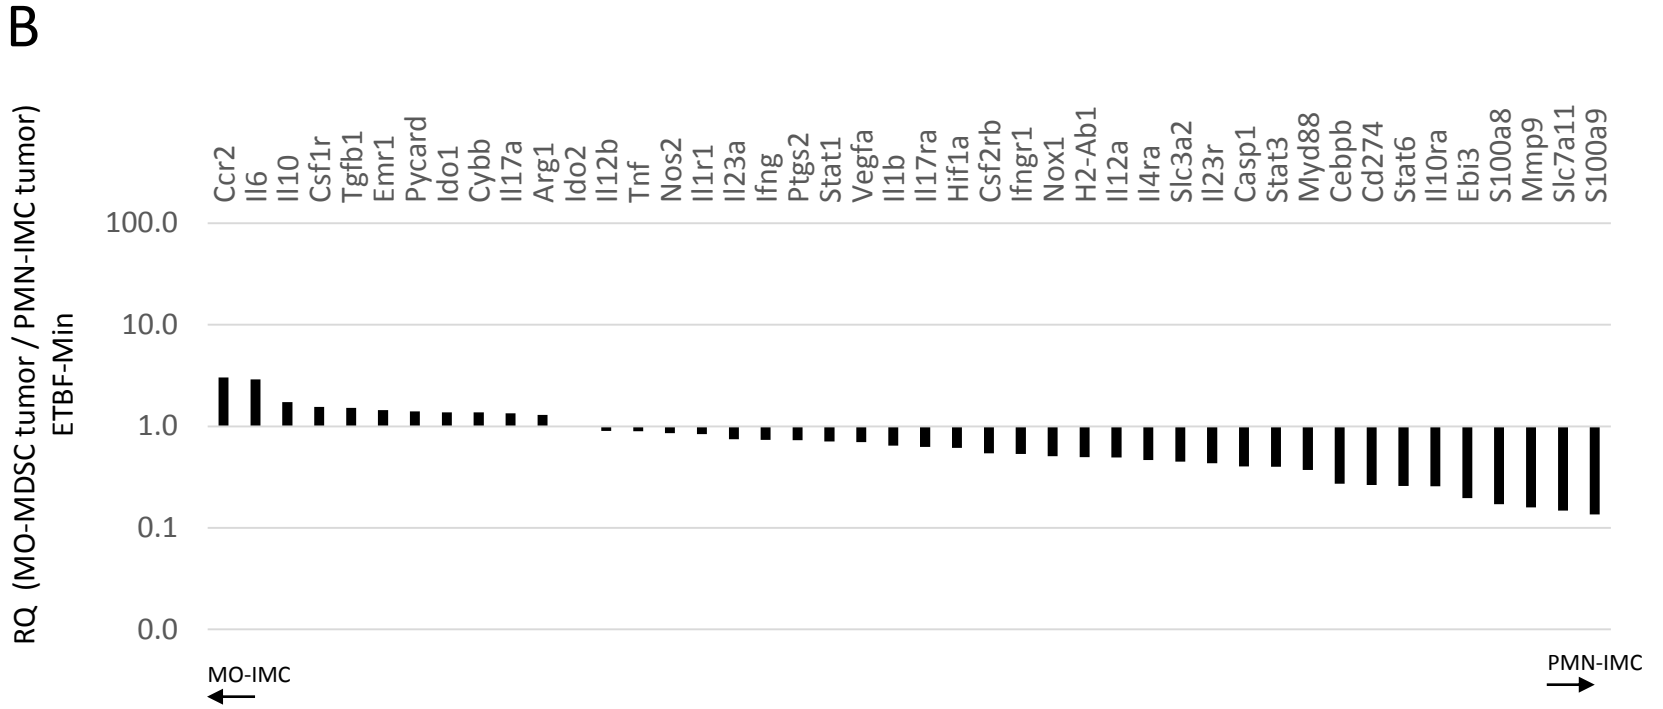

**Figure S3B** Same as in A, however comparing intratumoral MO-MDSCs to PMN-IMCs of 3 month ETBF Min mice. Representative graph of n=2 independent experiments.

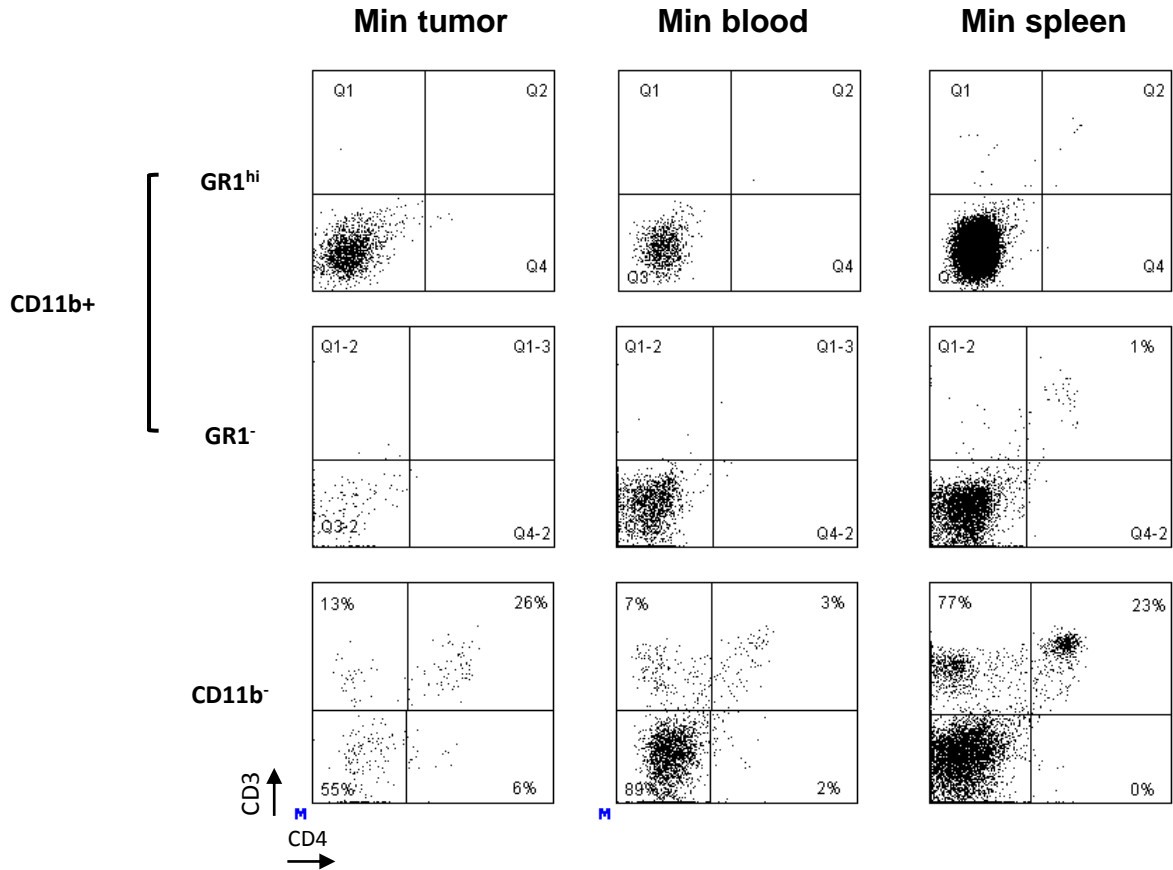

**Figure S4. Myeloid cell populations (CD11b<sup>+</sup>GR1<sup>hi</sup> and CD11b<sup>+</sup>GR1<sup>neg</sup>) cell-sorted from colon tumors for IL-17 qPCR were not contaminated by T cells.**

Plots represent pre-sort CD3 and CD4 staining in CD11b<sup>+</sup>GR1<sup>hi</sup>, CD11b<sup>+</sup>GR1<sup>neg</sup> and CD11b<sup>-</sup> gates used for cell sorting and subsequent *Il17a* mRNA detection in myeloid cells associated with colon tumors, blood or spleen of 3 month ETBF-colonized Min mice. Representative staining of n=2 independent samples from one cell sorting experiment.

**Figure S4**

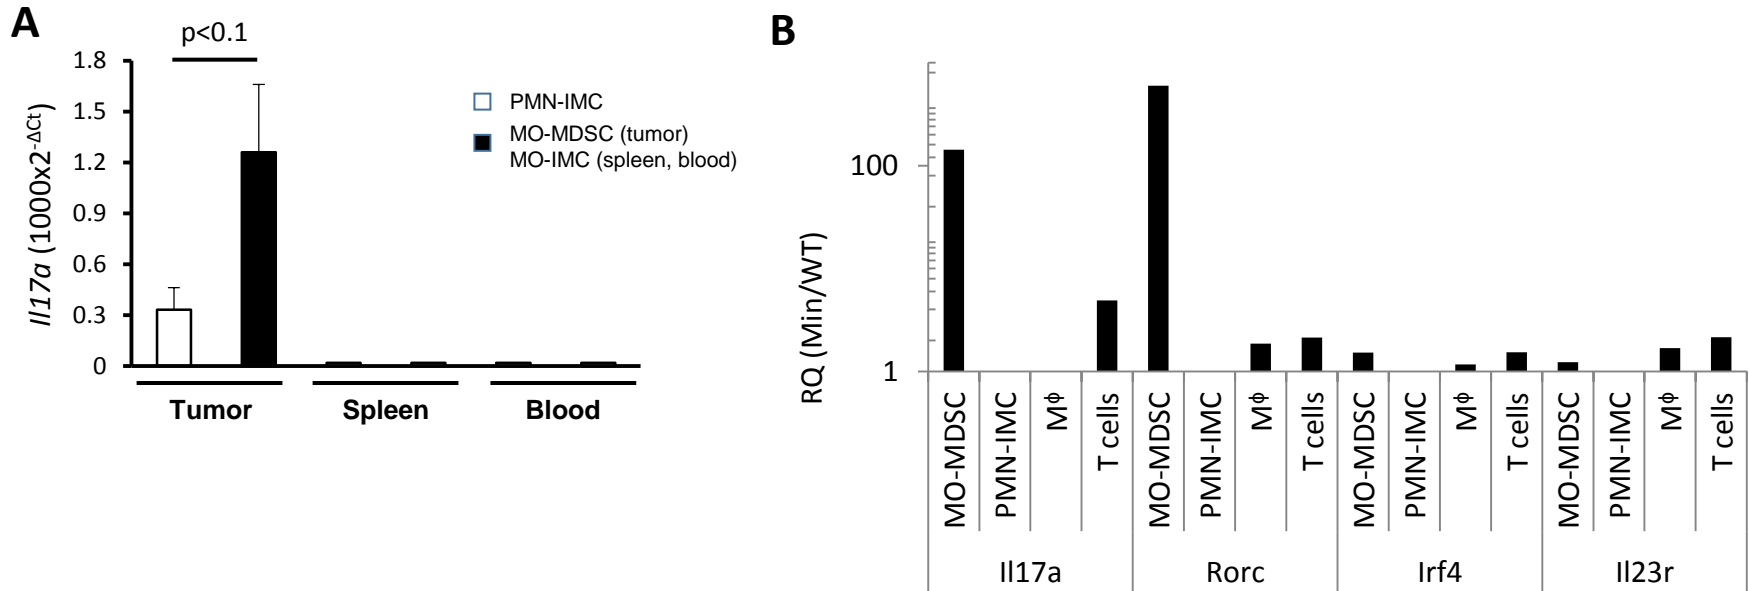

### Figure S5. Tumor-infiltrating MDSCs express *Il17a* gene in colon tumors.

**A**, PMN-IMCs and MO-MDSCs or MO-IMCs were sorted from tumors, spleen or blood of 3 month ETBF-colonized Min mice. RNA extracted from each cell subset was assessed by qPCR for *Il17a* gene expression. Mean  $\pm$  SEM is shown. Ct values were normalized with  $Ct_{Gapdh}$  ( $\Delta Ct = Ct - Ct_{Gapdh}$ ) and bars represent  $2^{-\Delta Ct}$ . Aggregate data of  $n=2$  independent experiments.

**B**, Myeloid and lymphoid populations were cell-sorted from C57BL/6 (WT) or Min distal colon lamina propria at day 7 post-ETBF colonization and assessed for *Il17a*, *Rorc*, *Irf4* and *Il23r* expression by qPCR. Bars represent fold increased (RQ) between Min and wild type cell populations,  $RQ = 2^{-\Delta \Delta Ct}$ . Representative staining of  $n=2$  independent samples from one cell sorting experiment.

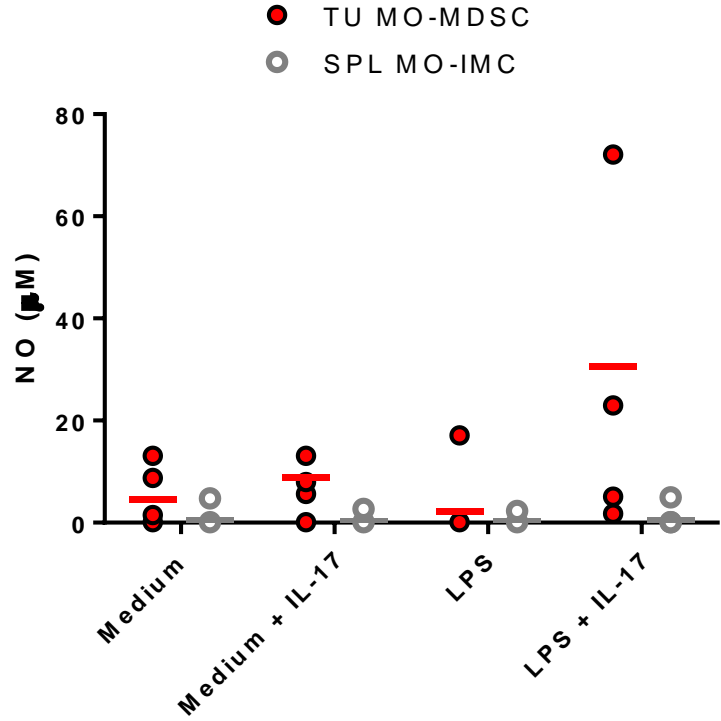

**Figure S6. Confirmation of Nos2 gene expression by detection of nitric oxide in culture supernatant of rIL-17-conditioned purified MO-MDSC.**

MO-MDSCs cell-sorted from colon tumors or MO-IMCs sorted from spleen in ETBF Min mice were incubated overnight with IL-17 (10 ng/ml) in presence or absence of LPS (100ng/ml). Nitric oxide (NO) was measured in culture supernatants using a colorimetric assay. Lines represent geometric mean. Aggregate data from n=3-4 independent experiments.

**Figure S6**

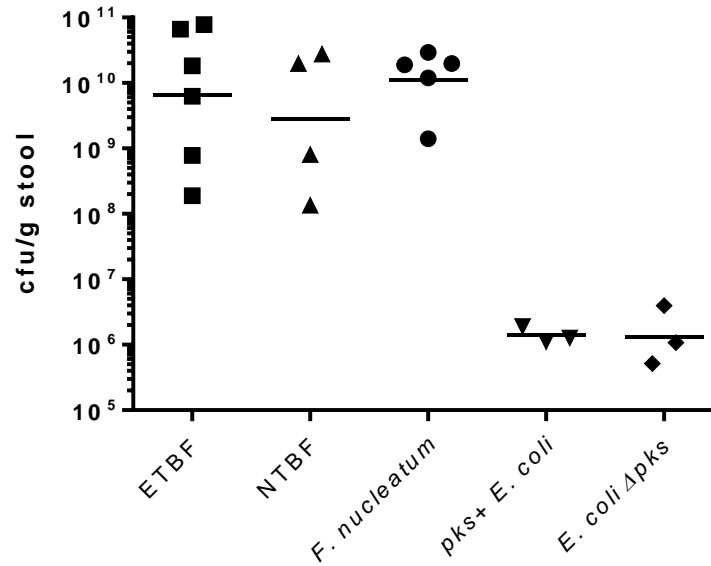

### Figure S7. Stool culture of oncogenic bacteria to confirm colonization.

Fresh stool samples were collected 7 days after inoculation with *F. nucleatum*, *pks*<sup>+</sup> *E. coli*, *E. coli*  $\Delta$ *PKS*, ETBF or NTBF. Samples were homogenized in PBS, serially diluted and cultured on Brucella (*F. nucleatum*), BHI (ETBF, NTBF) or MacConkey (*E. coli*) agar under optimal anaerobic or aerobic conditions. Colony forming units were manually counted within 24-48h of culturing.



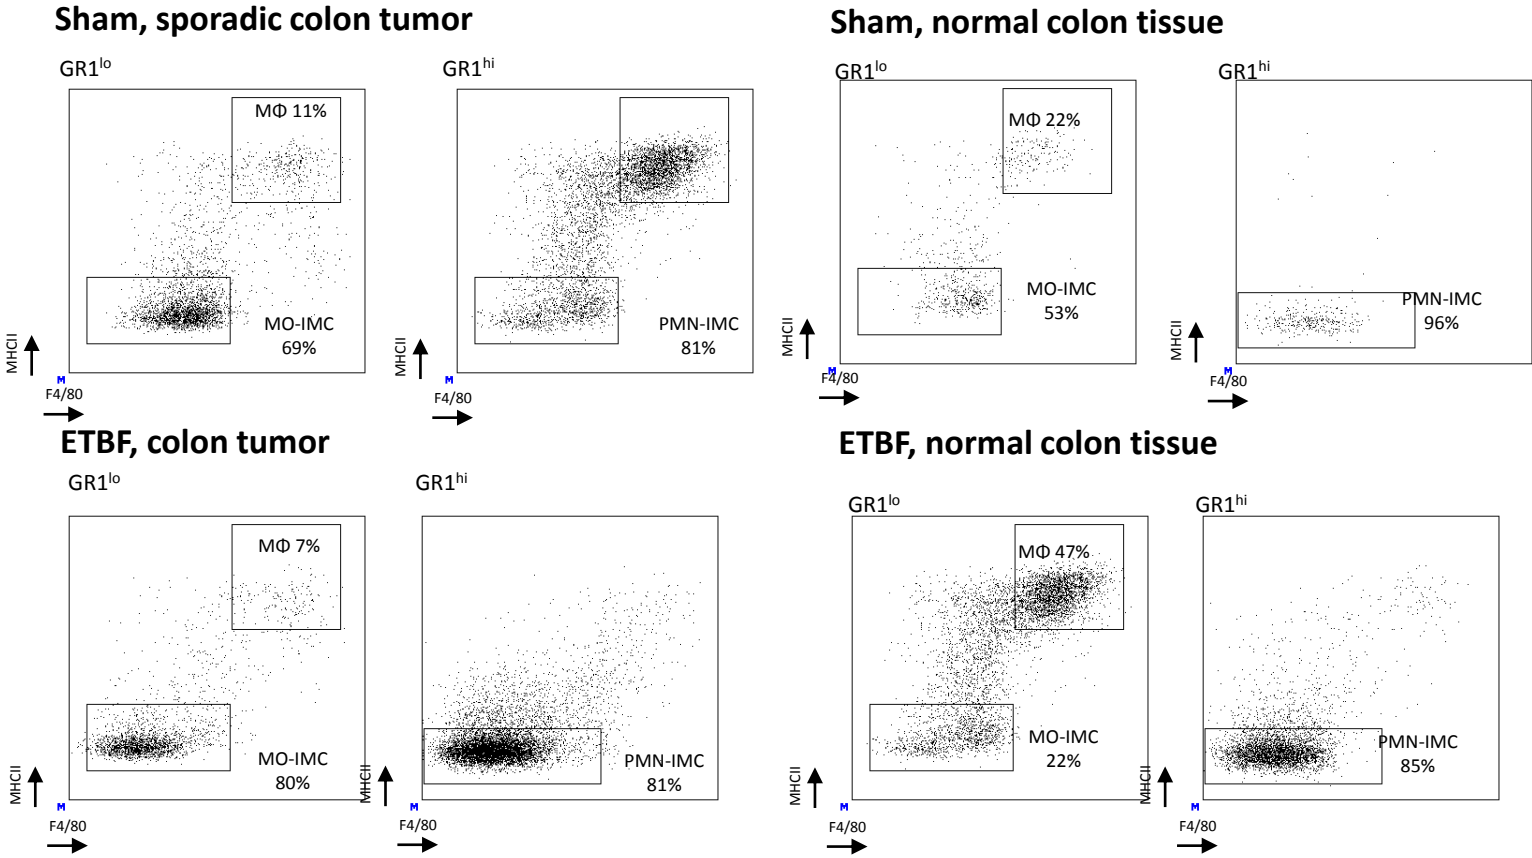

**Figure S8. Additional representative flow plots of MO-IMC, PMN-IMC and Mφ subsets in sporadically occurring or ETBF-triggered colon tumors, as well as normal colon tissue. As described in Fig. 3A, 3B.**

**Figure S8**

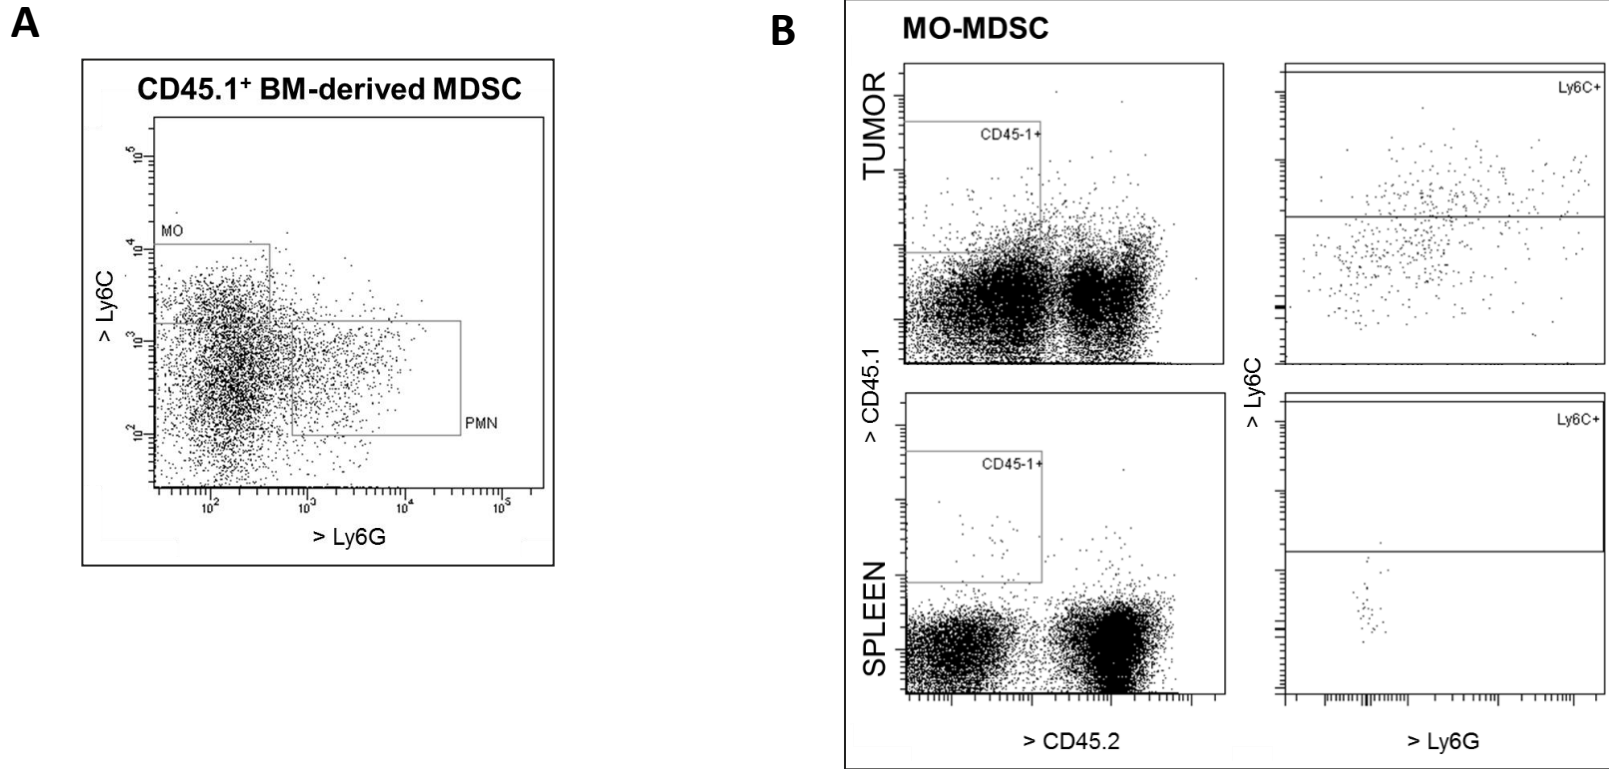

**Figure S9. Gating strategy for the recovery of adoptively-transferred *in vitro* derived BM-MDSC.**

**A**, CD45.1<sup>+</sup> bone marrow cells were harvested and MDSCs were derived *in vitro* by culture with G-CSF, GM-CSF and IL-13 for 5 days. MO-MDSCs were cell-sorted and adoptively transferred to Min recipients previously infected with ETBF (ETBF 11 weeks) via tail-vein injection.

**B**, Colon tumors were harvested 1 week later (ETBF 12 weeks) and CD45.1<sup>+</sup> were recovered and sorted by FACS for RNA extraction and Arg1/Nos2 qPCR analysis.
